# Supplementary material
Source: Springer Nature journal article supplement (https://www.springermedizin.de/resource/supplementary/12865_2013_580_MOESM9_ESM.pdf/9428280)

# Anti-DNA Autoantibody Levels

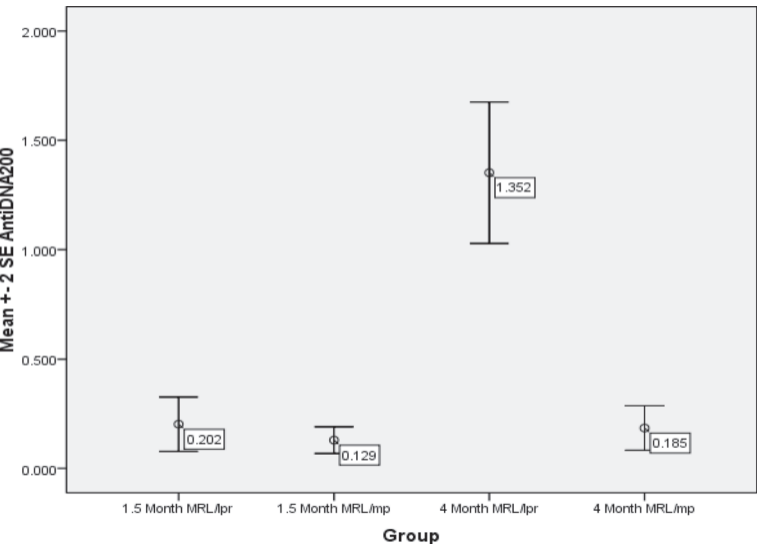

Supplement: MOESM9 [file 9428280]
